# Supplementary material for: Generic amyloidogenicity of mammalian prion proteins from species susceptible and resistant to prions
Source: PubMed Central journal article supplement (PMC4650755; doi:10.1038/srep10101), 2015-05-11
Supplement: srep10101-s1.pdf [file srep10101-s1.pdf]

Supporting information

# Generic amyloidogenicity of mammalian prion proteins from species susceptible and resistant to prions

*Sofie Nyström and Per Hammarström\**

IFM-Department of Chemistry, Linköping University, SE-581 83 Linköping, Sweden

[\\*corresponding author e-mail: perha@ifm.liu.se](mailto:perha@ifm.liu.se)

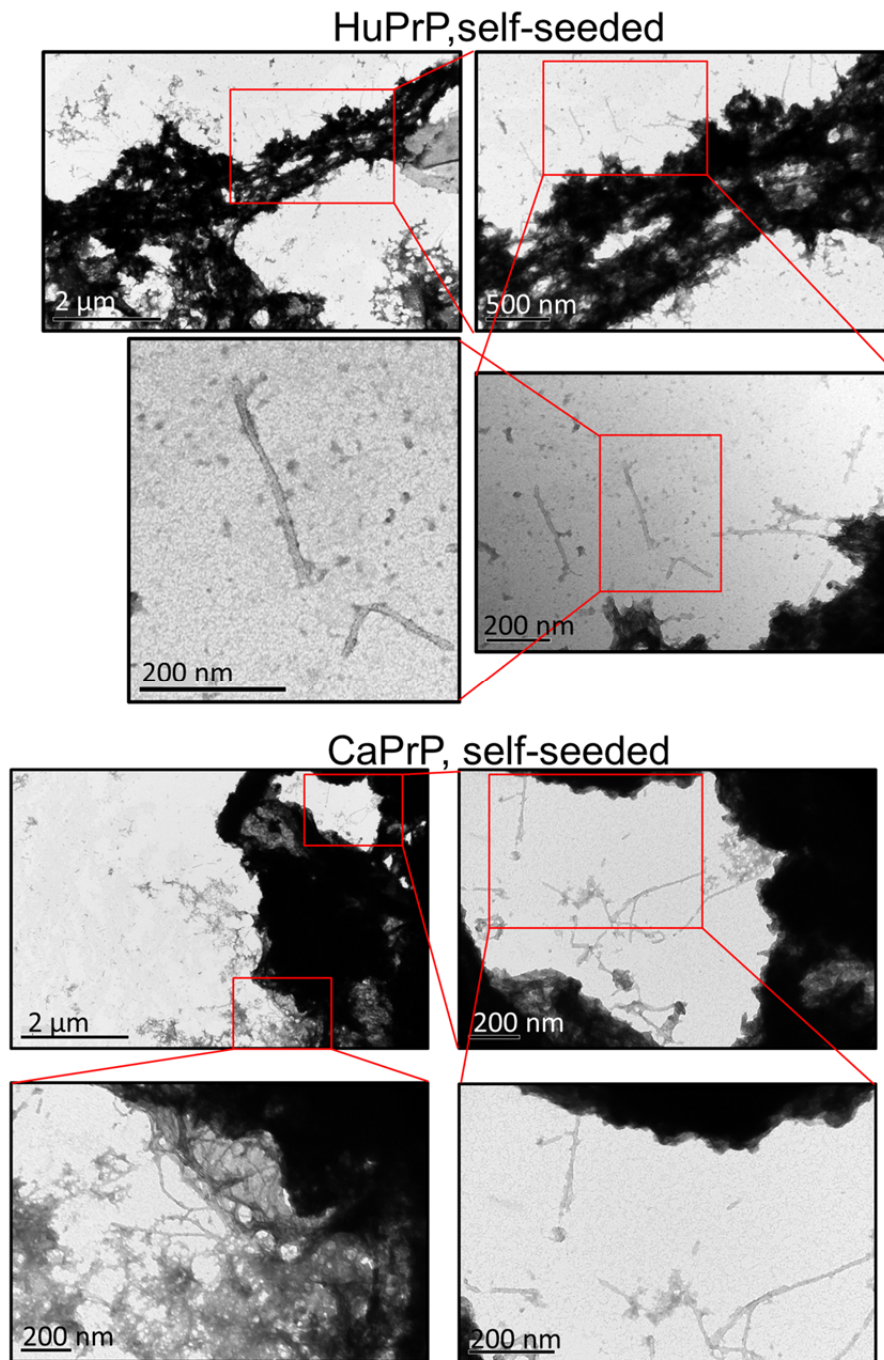

**FIGURE S1: Examples of ultrastructure of seeded mammalian PrP aggregates by transmission electron microscopy. HuPrP and CaPrP displayed common features upon seeding showing fibrils protruding from heavily clustered aggregates.**
